# Supplementary material
Source: HighWire-hosted journal article supplement (https://www.cmajopen.ca/highwire/filestream/81200/field_highwire_adjunct_files/0/2018-0057-1-at.pdf)
Supplement: 2018-0057-1-at.pdf [file 2018-0057-1-at.pdf]

**Appendix 1 (as supplied by the authors):** Criteria for eligibility for endovascular therapy for acute ischemic stroke patients as per the ESCAPE trial<sup>1</sup>

|                                                                                                                                                                                 |                                                                                                                                                                              |
|---------------------------------------------------------------------------------------------------------------------------------------------------------------------------------|------------------------------------------------------------------------------------------------------------------------------------------------------------------------------|
| Patients that met all criteria, both clinical and imaging, were randomly assigned to receive endovascular therapy and best medical management or best medical management alone. |                                                                                                                                                                              |
| <b>Clinical Criteria</b>                                                                                                                                                        | <b>Imaging Criteria</b>                                                                                                                                                      |
| Functionally independent pre-stroke (Barthel index above 90)                                                                                                                    | Proximal intracerebral artery occlusion<br>M1-MCA, carotid L/T, basilar, M1-MCA equivalent on computed tomography angiography (CTA) of the extra- and intracerebral arteries |
| Moderate to Severe symptoms on presentation (National Institute of Health Stroke Scale (NIHSS) score above 5)                                                                   | Moderate- good collateral circulation on Multiphasic CTA                                                                                                                     |
| Time from stroke onset to femoral artery puncture < 6 hours<br>**consideration also given to presentation between 6-12 hours                                                    | ASPECTS (Alberta Stroke Program Early CT Score) > 5 on non-contrast computed tomography (CT)                                                                                 |

**Reference**

1. Demchuk AM, Goyal M, Menon BK, et al. Endovascular treatment for small core and anterior circulation proximal occlusion with emphasis on minimizing CT to recanalization times (ESCAPE) trial: methodology. *Int J Stroke* 2015;10:429-38.
